# Supplementary material for: MED12 regulates a transcriptional network of calcium-handling genes in the heart
Source: JCI journal article supplement (doi:10.1172/jci.insight.91920), 2017-07-19
Supplement: sd1 [file 1]

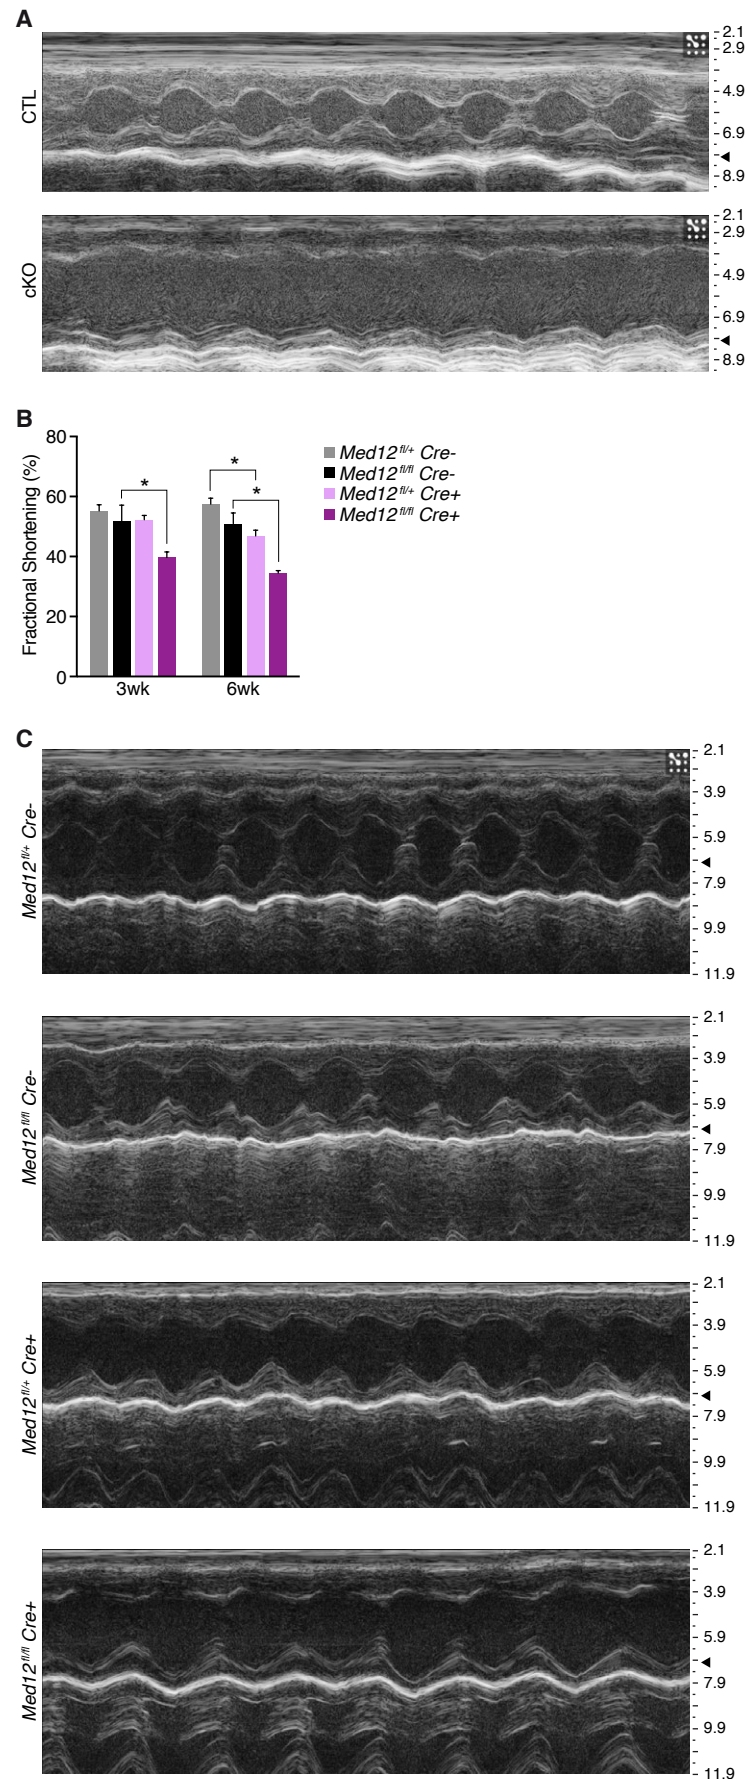

**Supplemental Figure 1. Deletion of *Med12* in cardiomyocytes impairs cardiac function in male and female mice.**

Related to Figure 1. (A) Representative M-mode echocardiogram from 6 week old male mice. (B) Fractional shortening of female hearts,  $n = 7$ . (C) Representative M-mode echocardiogram from 6 week old female mice. Data are mean  $\pm$  SEM.

\* $P < 0.05$  by one-way ANOVA with post-hoc Tukey Test.

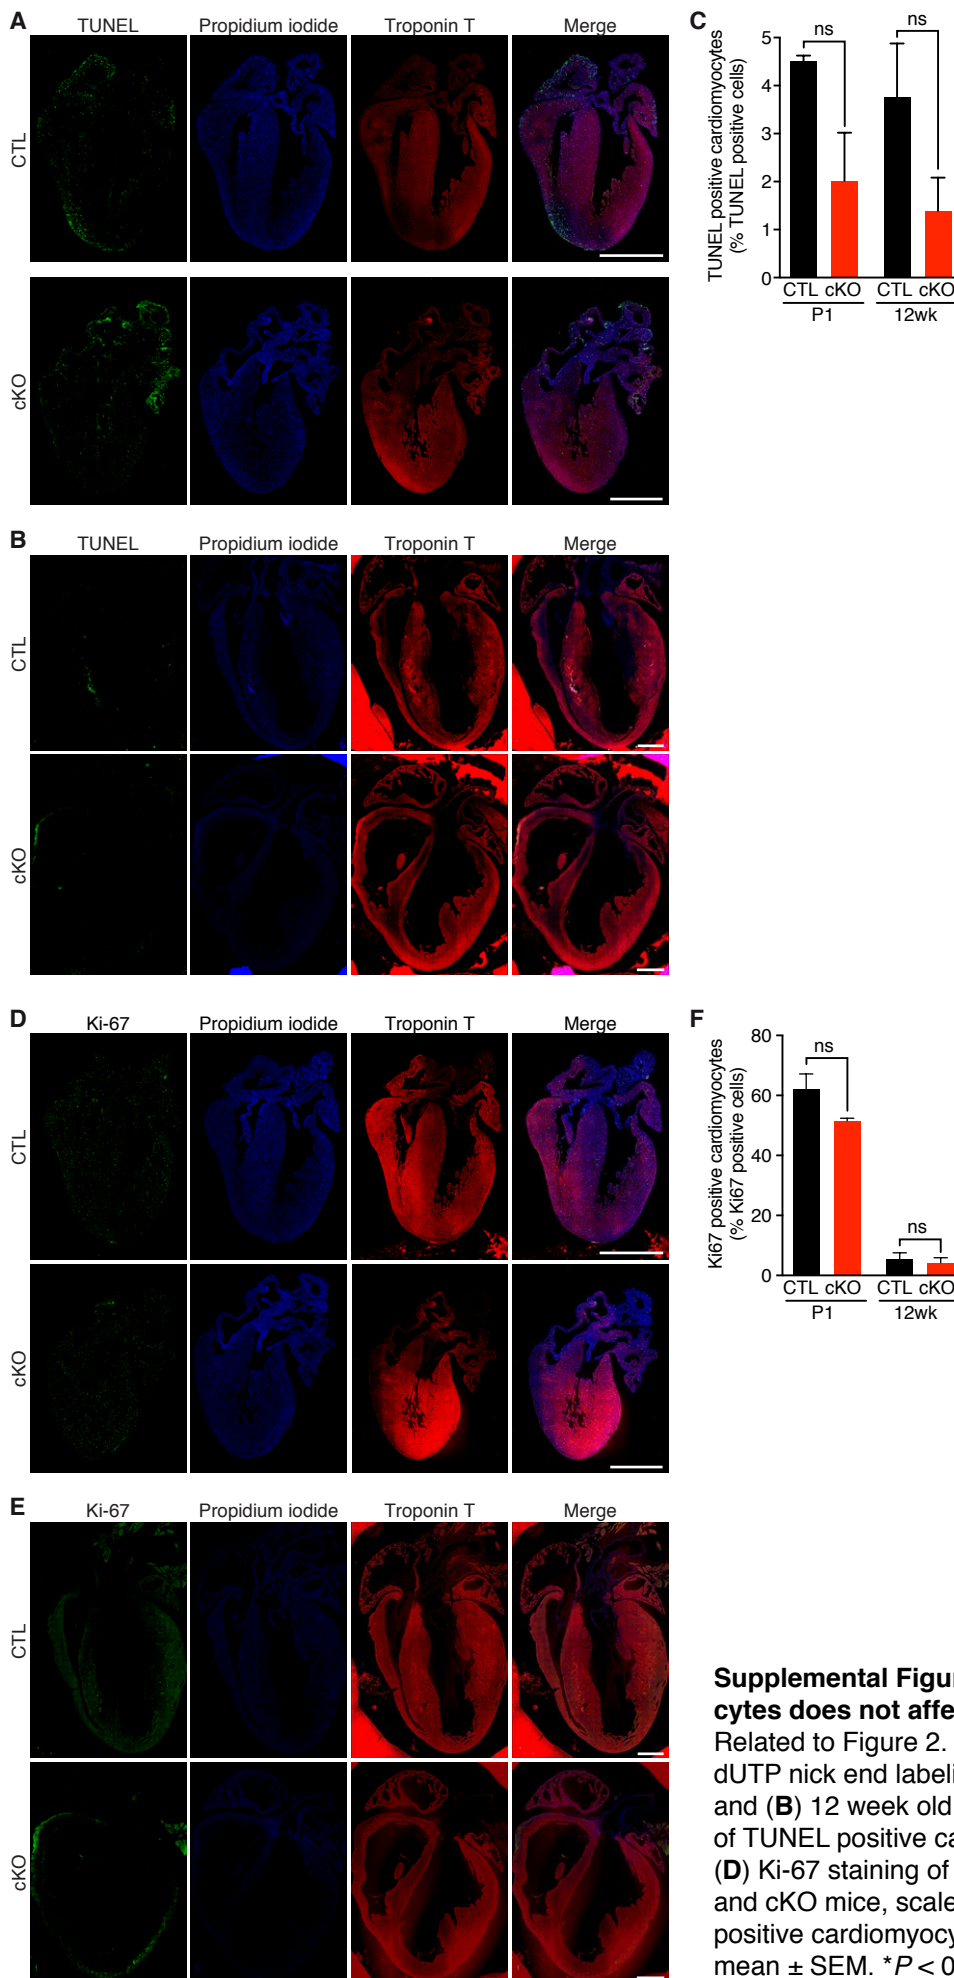

**Supplemental Figure 2. Deletion of *Med12* in cardiomyocytes does not affect cardiomyocyte death or proliferation.**

Related to Figure 2. (A) Terminal deoxynucleotidyl transferase dUTP nick end labeling (TUNEL) staining of hearts from P1 and (B) 12 week old CTL and cKO mice. (C) Quantification of TUNEL positive cardiomyocytes,  $n = 3$  layers from 3 mice. (D) Ki-67 staining of hearts from P1 and (E) 12 week old CTL and cKO mice, scale bars: 1mm. (F) Quantification of Ki-67 positive cardiomyocytes,  $n = 3$  layers from 3 mice. Data are mean  $\pm$  SEM. \* $P < 0.05$  by Student's T test.

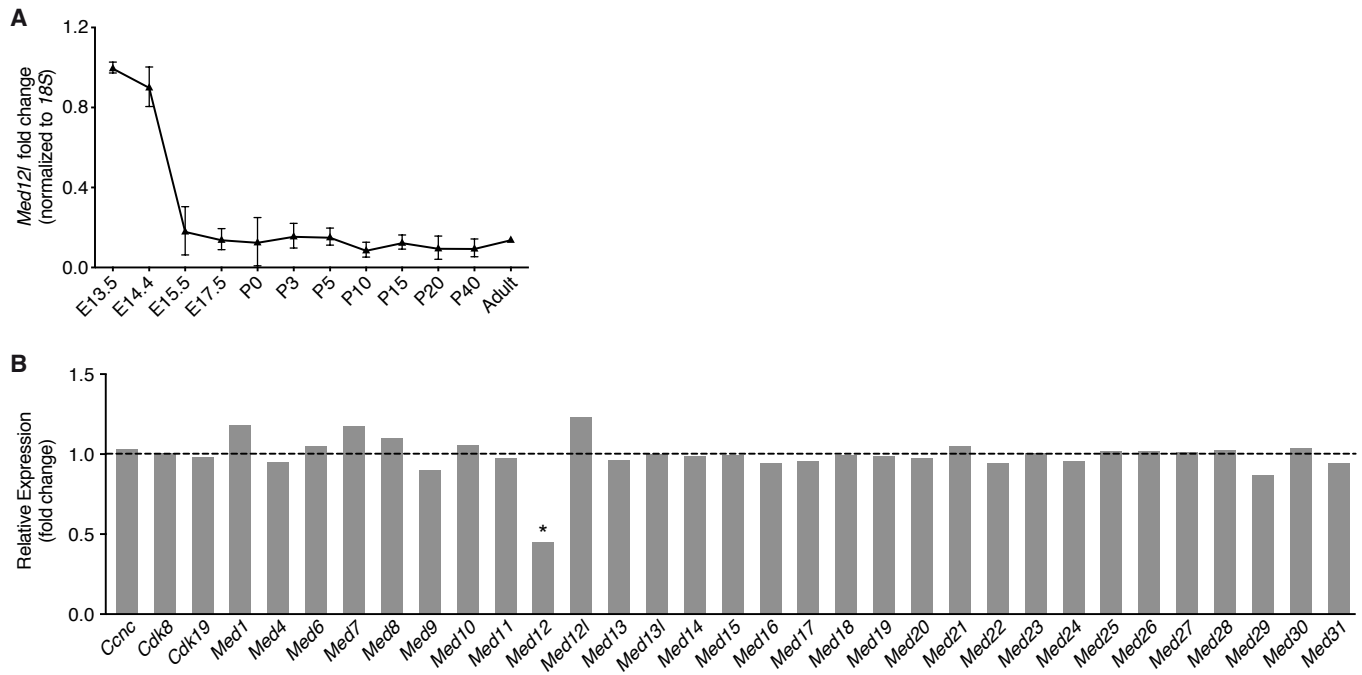

**Supplemental Figure 3. Deletion of *Med12* in cardiomyocytes does not affect expression of other Mediator subunits.** Related to Figure 3. **(A)** *Med12l* expression in ventricles during development and aging of mouse hearts,  $n = 3$ . **(B)** Expression of other Mediator components in *Med12cKO* hearts by RNA-seq,  $n = 3$ . Data are mean  $\pm$  SEM.

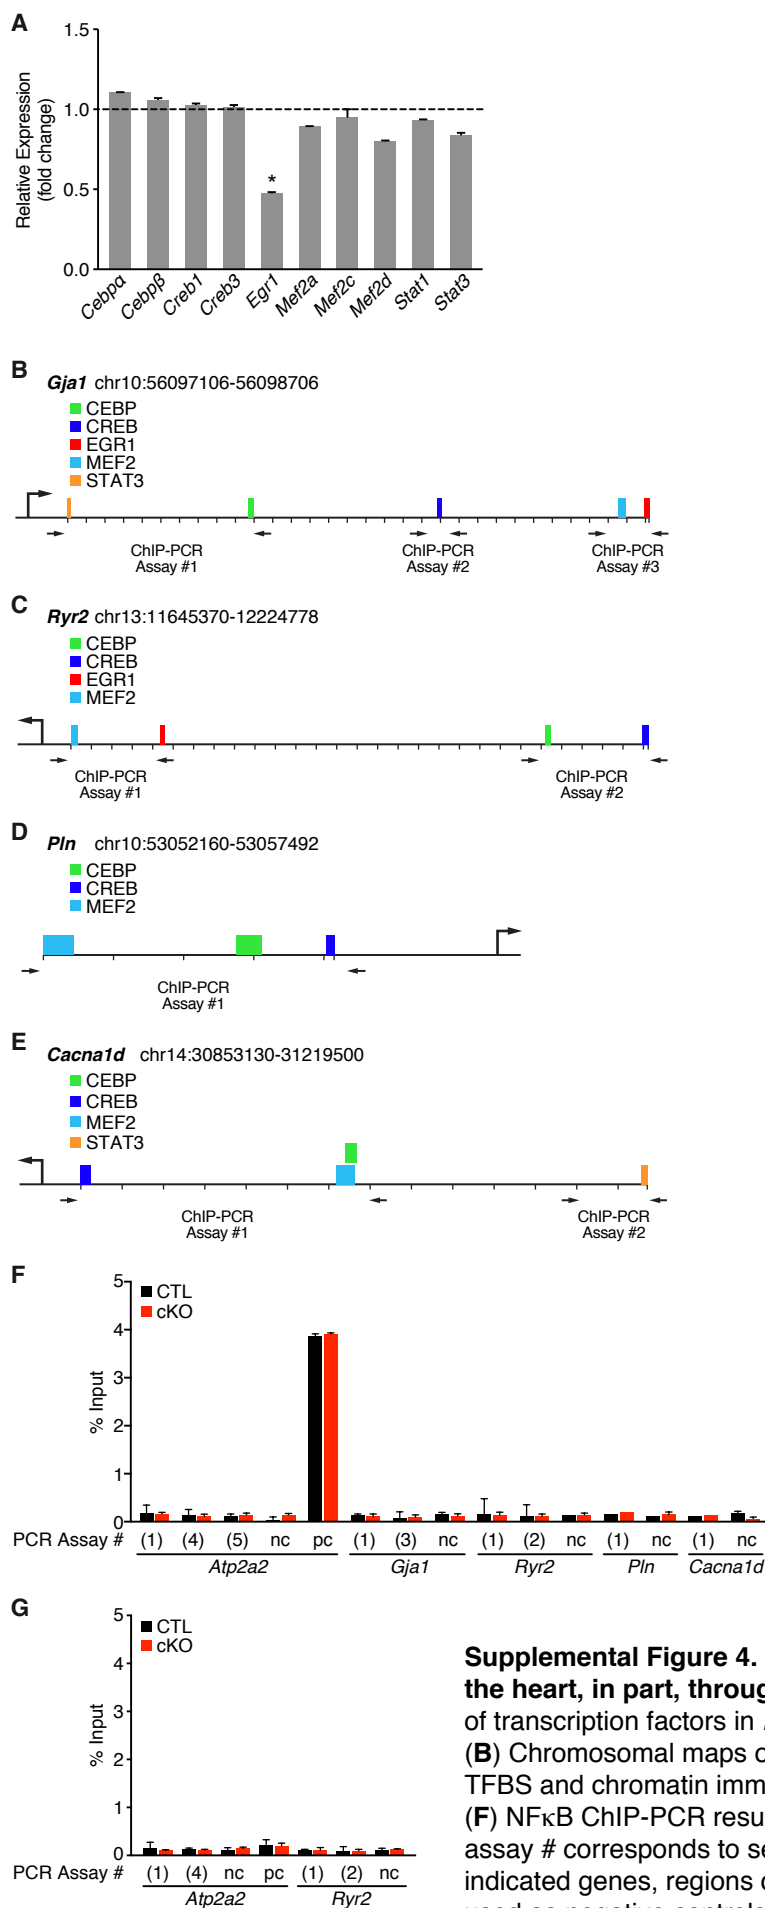

**Supplemental Figure 4. MED12 regulates calcium handling genes in the heart, in part, through MEF2.** Related to Figure 5. (A) Expression of transcription factors in *Med12cKO* hearts by RNA-seq,  $n = 3$ . (B) Chromosomal maps of *Gja1*, (C) *Ryr2*, (D) *Pln*, and (E) *Cacna1d* with TFBS and chromatin immunoprecipitation (ChIP)-PCR assay primers. (F) NF $\kappa$ B ChIP-PCR results for select calcium handling genes. PCR assay # corresponds to sequences on chromosomal maps for the indicated genes, regions devoid of transcription factor binding sites were used as negative controls (nc), and a region known to bind NF $\kappa$ B was used as a positive control (pc),  $n = 4$ . (G) MED12- NF $\kappa$ B ChIP-reChIP on *Atp2a2* and *Ryr2* promoters,  $n = 4$ . Data are mean  $\pm$  SEM. \* $P < 0.05$  by Student's T test.

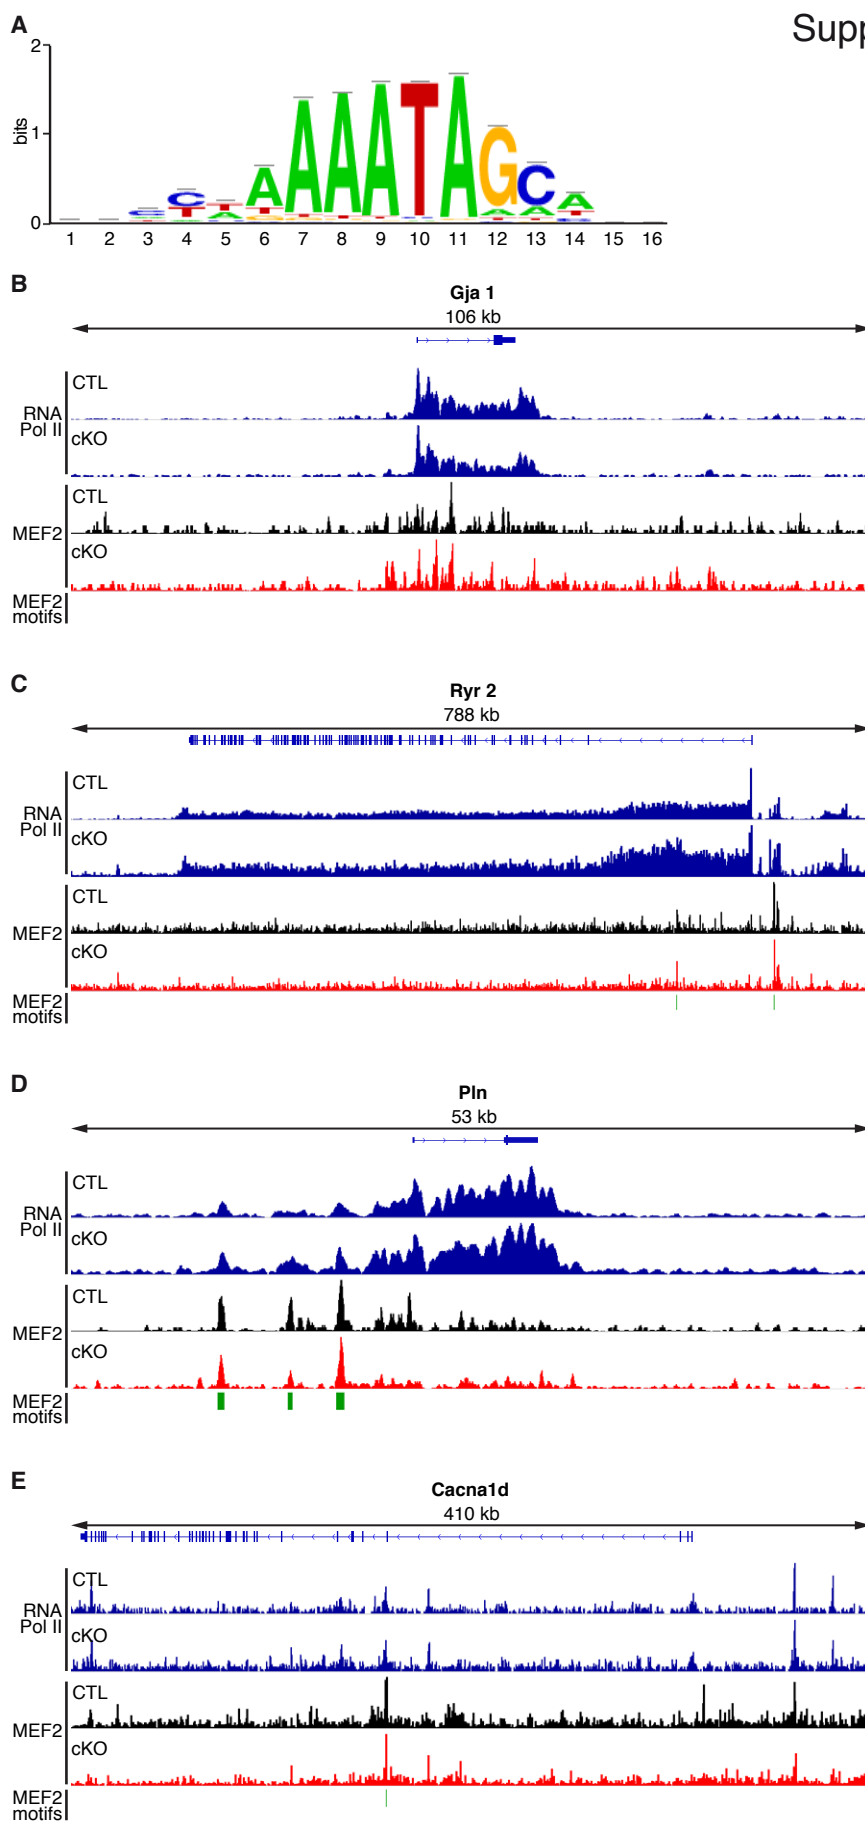

**Supplemental Figure 5. Loss of MED12 does not affect MEF2 or RNA Polymerase II DNA binding.** Related to Figure 5. (A) De novo motif discovery was performed using the top 8000 peaks from MEF2 ChIP-seq reads. The MEF2 motif was the top motif with MEF2 C having the highest Pearson correlation (0.945), k-mer sig=47.36, evalue=-4.4e-48. (B) RNA polymerase II and MEF2 ChIP-seq signals at the *Gja1* locus (C) *Ryr2* locus, (D) *Pln* locus, and (E) *Cacna1d* locus in CTL and cKO ventricles. MEF2 motif locations are shown in green.
